# Supplementary material for: Cyclical regulation of the insulin-like growth factor binding protein 3 gene in response to 1α,25-dihydroxyvitamin D3
Source: PubMed Central journal article supplement — Nucleic Acids Res. 2010 Sep 18;39(2):502–12. doi: 10.1093/nar/gkq820 (PMC3025564; doi:10.1093/nar/gkq820), 2010-09-18
Supplement: supp_gkq820_Malinen-supp.pdf [file supp_gkq820_Malinen-supp.pdf]

## SUPPLEMENTARY TABLES

**Table S1: Quantitative real-time PCR primers.** Sequence and product size of primer pairs used for gene-specific quantitative real-time PCR.

| Gene           | Primer pairs (5' - 3')                           | Product size (bp) | Annealing temperature (°C) |
|----------------|--------------------------------------------------|-------------------|----------------------------|
| <i>RPLP0</i>   | AGATGCAGCAGATCCGCAT<br>GTGGTGATACCTAAAGCCTG      | 318               | 58-62                      |
| <i>IGFBP3</i>  | AAGTTGACTACGAGTCTCAG<br>ACGGCAGGGACCATATTC       | 83                | 58                         |
| <i>CYP24A1</i> | CAAACCGTGGAAGGCCTATC<br>AGTCTTCCCCTTCCAGGATCA    | 70                | 62                         |
| <i>HDAC1</i>   | GATCTGCTCCTCTGACAAAC<br>GACTTCTTTCTTCTCCTCTG     | 159               | 60                         |
| <i>HDAC2</i>   | CAGTGGAGATGAAGATGGAG<br>TTTCACCACTGTTGTCCTTG     | 241               | 60                         |
| <i>HDAC3</i>   | CTTCATCCAGATGTCAGCAC<br>TCCACATCGCTTTCCTTGTC     | 268               | 60                         |
| <i>HDAC4</i>   | GCATGTGTTTCTGCCTTGCTG<br>GTTCTCGCAAGTCTGAGCCT    | 191               | 60                         |
| <i>HDAC5</i>   | ATGCTGTTGAAGGACATCTG<br>TCTGGATCTCGATGACTTTC     | 272               | 60                         |
| <i>HDAC6</i>   | GCAAGGGATGGATCTGAACC<br>CTAGGCTGTGAACCAACATC     | 201               | 60                         |
| <i>HDAC7</i>   | CTCACTGTCAGCCCCAGAG<br>TGTCACGCAGGACCACTG        | 249               | 62                         |
| <i>HDAC8</i>   | ACCAGATCTGTGAAAGTGTAC<br>AACTAGACCACATGCTTCAG    | 414               | 60                         |
| <i>HDAC9</i>   | GCAGATCCACATGAACAAACTG<br>GATCTGAGCATCTTCATCACTG | 240               | 60                         |
| <i>HDAC10</i>  | ATTGAAAGAACAATGCG<br>CTCTGGGCTCCGTGGGAC          | 367               | 62                         |
| <i>HDAC11</i>  | GGACGACAAGCGTGTGTACATC<br>AGCGGTGTGTCTGAGTTCTGTG | 443               | 60                         |

**Table S2: ChIP primers.** Location (relative to TSS) and sequence of the PCR primer pairs used to detect two genomic regions of the human *IGFBP3* promoter.

| VDRE  | Location       | Primer sequence (5' - 3')                    |
|-------|----------------|----------------------------------------------|
| RE1/2 | -419 to -293   | CGCTGTATGCCAGTTTCC<br>TCACCCAGTCACTCCTG      |
| RE3   | -3401 to -3256 | CTCCCACATTGTTTAAGACTC<br>GTAGGCAGTGTGACAGCAG |

**Table S3: Sequences of hydrolysis probes used for the quantification of ChIP products.** The probes carry at their 5' a 6-FAM group and at their 3' a BHQ-1 group.

| Probe target | Location       | Probe sequence (5' - 3')  |
|--------------|----------------|---------------------------|
| RE1/2        | -389 to -369   | TCGCCGCAGGGAGACCTCAC      |
| RE3          | -3376 to -3351 | TCAAATGCCACCACCTCTCAGAAGT |

**Table S4: siRNA oligonucleotides.** Location (relative to the TSS) and sequence of siRNA oligonucleotides used for gene-specific silencing.

| Target gene  | Location | Sequence of + oligonucleotide (5' - 3') |
|--------------|----------|-----------------------------------------|
| control      | -        | UGCGCUACGAUCGACGAUG                     |
| <i>HDAC4</i> | 1117     | CGAGCACAUCAAGCAACAA                     |
|              | 1521     | CAGCUUCUGAACCGAAUCU                     |
|              | 3279     | GCGUGAGCAAGAUCUCAU                      |
| <i>HDAC6</i> | 174      | GUGUCACUUCGAAGCGAAA                     |
|              | 1771     | CCGUGAGAGUCCAACUUU                      |
|              | 2621     | GGACCCUCCAGUUCUAAGU                     |

## SUPPLEMENTARY FIGURES

**Fig. S1: Induction of *CYP24* transcription by  $1\alpha,25(\text{OH})_2\text{D}_3$  and Gemini in MCF-10A cells.** Real-time quantitative PCR was performed in order to measure the time-dependent mRNA expression of the *CYP24* gene in MCF-10A cells after treatment with 10 nM  $1\alpha,25(\text{OH})_2\text{D}_3$  (A) or 10 nM Gemini (B). The data were normalized to the expression of the housekeeping gene *RPLP0* and fold inductions were calculated in reference to vehicle control. Data points indicate the means of at least three independent cell treatments and the bars represent standard deviations. A two-tailed Student's t-test was performed to determine the significance of the stimulation in reference to vehicle-treated control (\*  $p < 0.05$ ; \*\*  $p < 0.01$ ; \*\*\*  $p < 0.001$ ).

**Fig. S2: Induction of *IGFBP3* transcription by  $1\alpha,25(\text{OH})_2\text{D}_3$  and Gemini in RWPE-1 cells.** Real-time quantitative PCR was performed in order to measure the time-dependent mRNA expression of the *IGFBP3* gene in MCF-10A cells after treatment with 10 nM  $1\alpha,25(\text{OH})_2\text{D}_3$  (A) or 10 nM Gemini (B). The data were normalized to the expression of the housekeeping gene *RPLP0* and fold inductions were calculated in reference to vehicle control. Data points indicate the means of at least three independent cell treatments and the bars represent standard deviations. A two-tailed Student's t-test was performed to determine the significance of the stimulation in reference to vehicle-treated control (\*  $p < 0.05$ ; \*\*  $p < 0.01$ ; \*\*\*  $p < 0.001$ ).

**Fig. S3: Basal expression of *HDAC* genes in MCF-10A cells.** Real-time quantitative PCR was used to determine the basal expression of *IGFBP3* and the 11 *HDAC* genes in relation to the housekeeping gene *RPLP0* in non-treated MCF-10A cells. Data points represent the mean +/- standard deviation of at least three experiments.

**Fig. S4: *In silico* screening for VDREs.** Each 10 kB genomic DNA (thin black line) upstream of human genes *IGFBP3*, *HDAC4* and *HDAC6* were screened *in silico* for VDREs (red boxes) as described in (8). Repetitive sequence is indicated in blue. All VDRE are of DR3-type, their sequences are indicated below.

**Fig. S5: No response of eight *HDAC* gene family members to  $1\alpha,25(\text{OH})_2\text{D}_3$ .** Real-time quantitative PCR was performed in order to measure the time-dependent mRNA expression of the genes *HDAC1* (A), *HDAC2* (B), *HDAC3* (C), *HDAC5* (D), *HDAC7* (E), *HDAC8* (F), *HDAC10* (G) and *HDAC11* (H) in MCF-10A cells after treatment with 10 nM  $1\alpha,25(\text{OH})_2\text{D}_3$ . The data were normalized to the expression of the housekeeping gene *RPLP0* and fold inductions were calculated in reference to vehicle control. Data points indicate the means of at least three independent cell treatments and the bars represent standard deviations. A two-tailed Student's t-test was performed to determine any significance of the stimulation in reference to vehicle-treated control (\*  $p < 0.05$ ).

**Fig. S6: No response of eight *HDAC* gene family members to Gemini.** Real-time quantitative PCR was performed in order to measure the time-dependent mRNA expression of the genes *HDAC1* (A), *HDAC2* (B), *HDAC3* (C), *HDAC5* (D), *HDAC7* (E), *HDAC8* (F), *HDAC10* (G) and *HDAC11* (H) in MCF-10A cells after treatment with 10 nM Gemini. The data were normalized to the expression of the housekeeping gene *RPLP0* and fold inductions were calculated in reference to vehicle control. Data points indicate the means of at least three independent cell treatments and the bars represent standard deviations. A two-tailed Student's t-test was performed to determine any significance of the stimulation in reference to vehicle-treated control (\*  $p < 0.05$ ; \*\*  $p < 0.01$ ).

**Fig. S7: siRNA controls.** MCF-10A cells were transfected for 24 h with 200 pmol of siRNAs against *HDAC4* and *HDAC6*. Real-time quantitative PCR was used to determine the reduction of the respective mRNA levels normalized by the control gene *RPLP0* (A). Bars represent the mean +/- standard deviation of at least three independent experiments. Western blotting in reference to  $\beta$ -actin expression was performed in order to prove the silencing effects also on the protein level (B). Representative gels are shown and their quantification is indicated below (standard deviations in brackets).

**Fig. S8: Sonication efficiency.** Sonicated reverse-crosslinked and purified chromatin used for ChIP experiments of this study was analyzed by agarose gel electrophoresis. A representative gel is shown. The experiments relate to ChIP assays with antibodies against VDR (1), Ach4 (2) and HDACs 4 and 6 (3) shown in Figs. 2 and 3.

# quantitative PCR

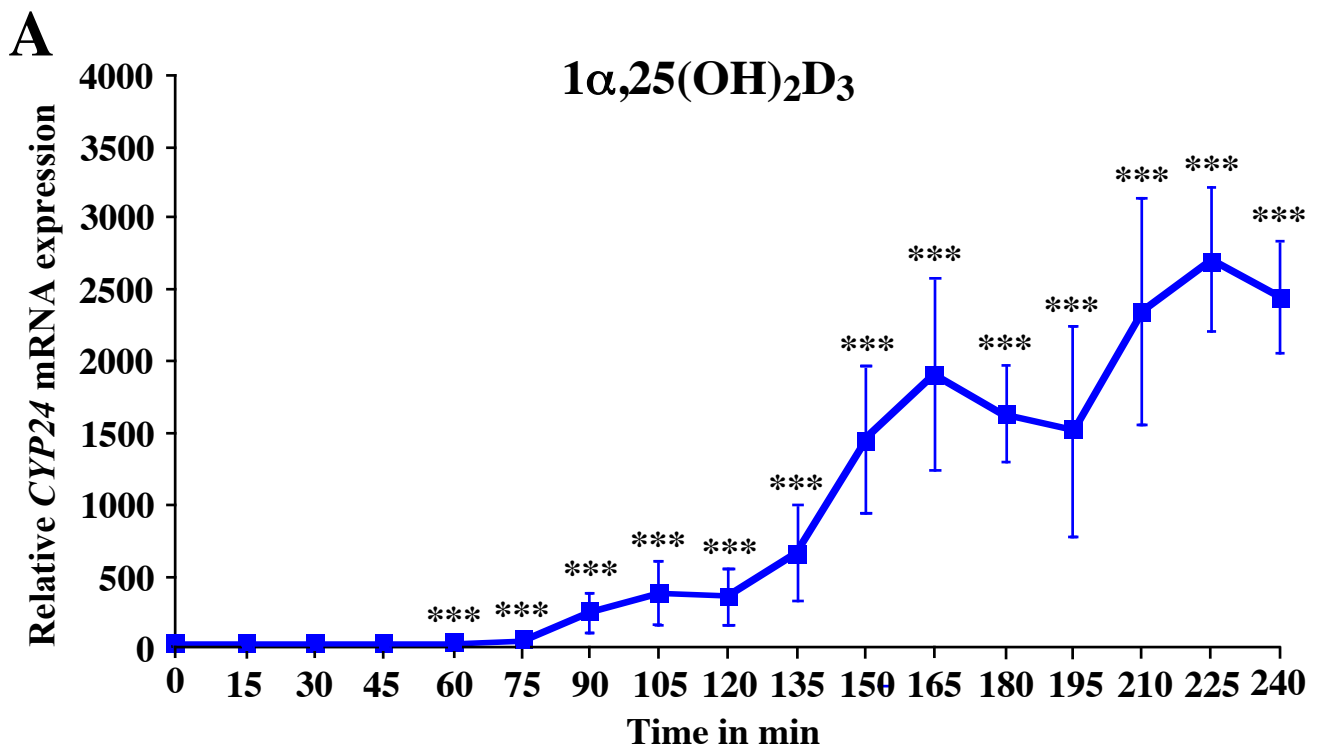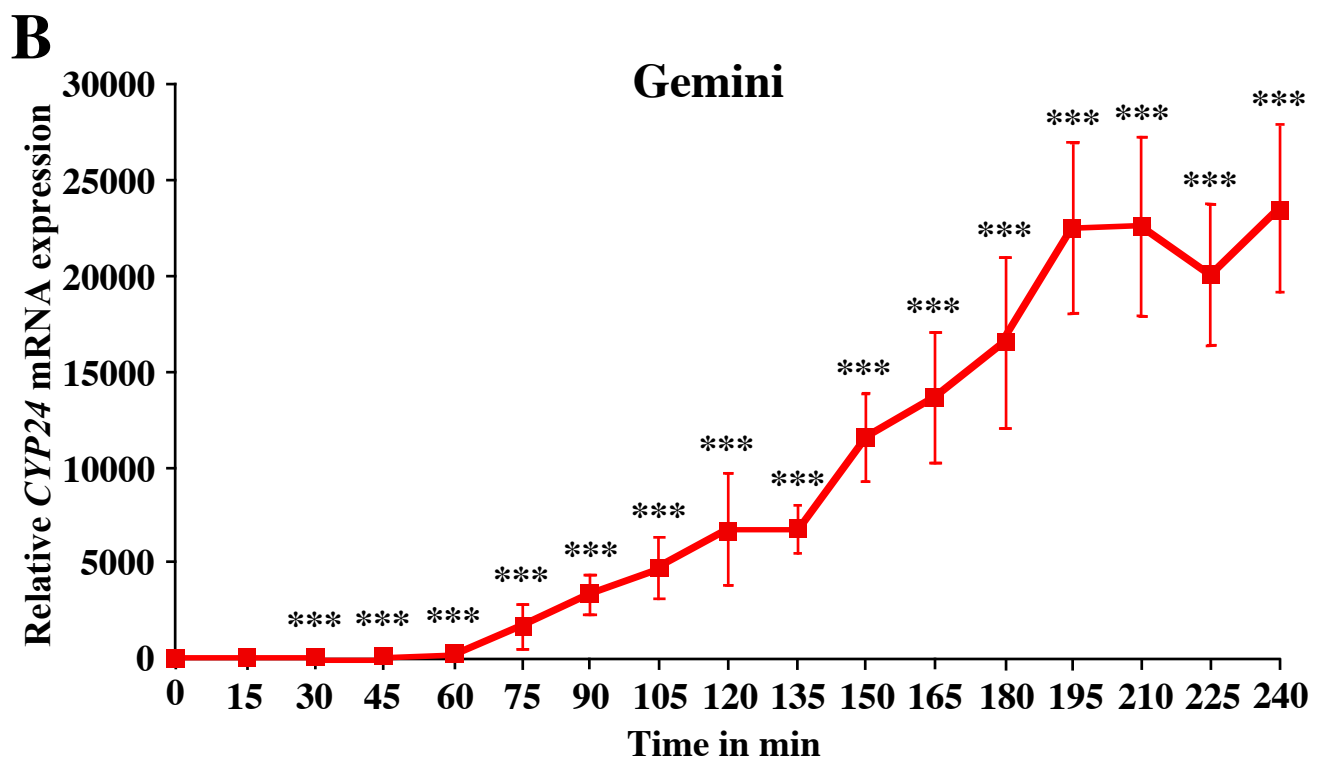

**Fig. S1**

# quantitative PCR

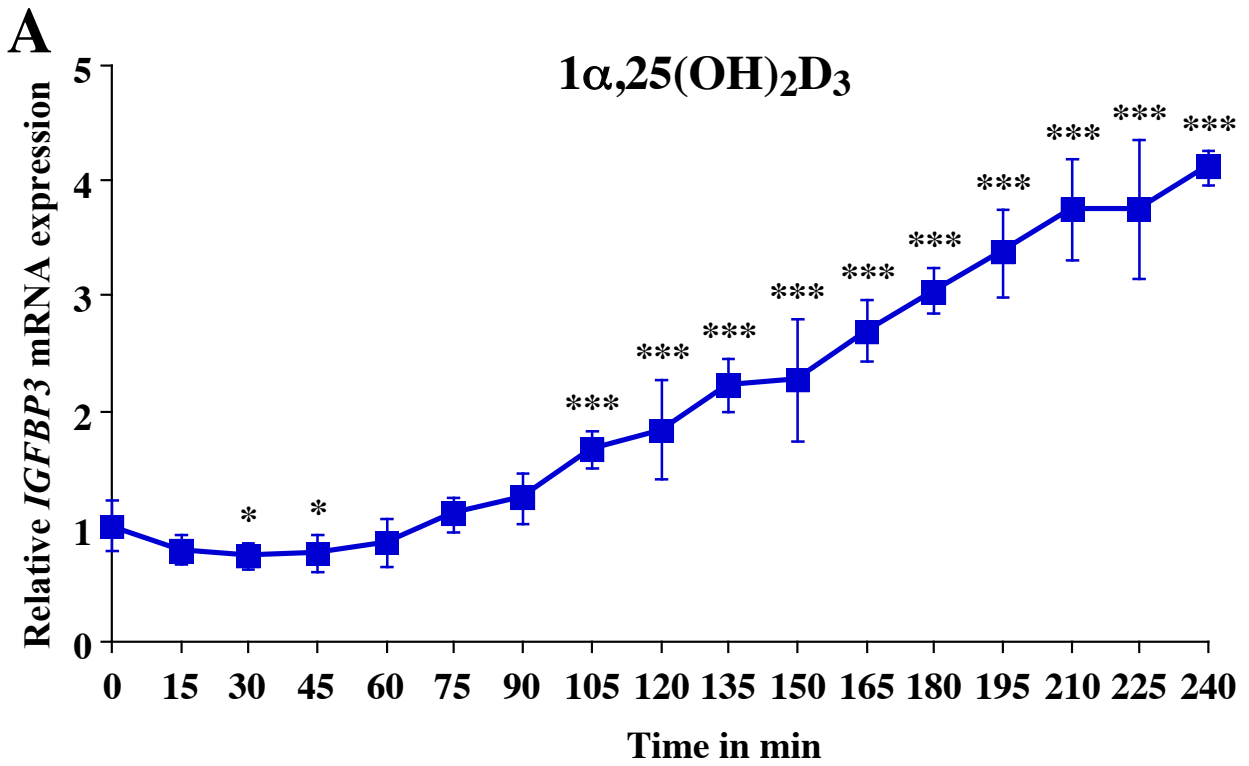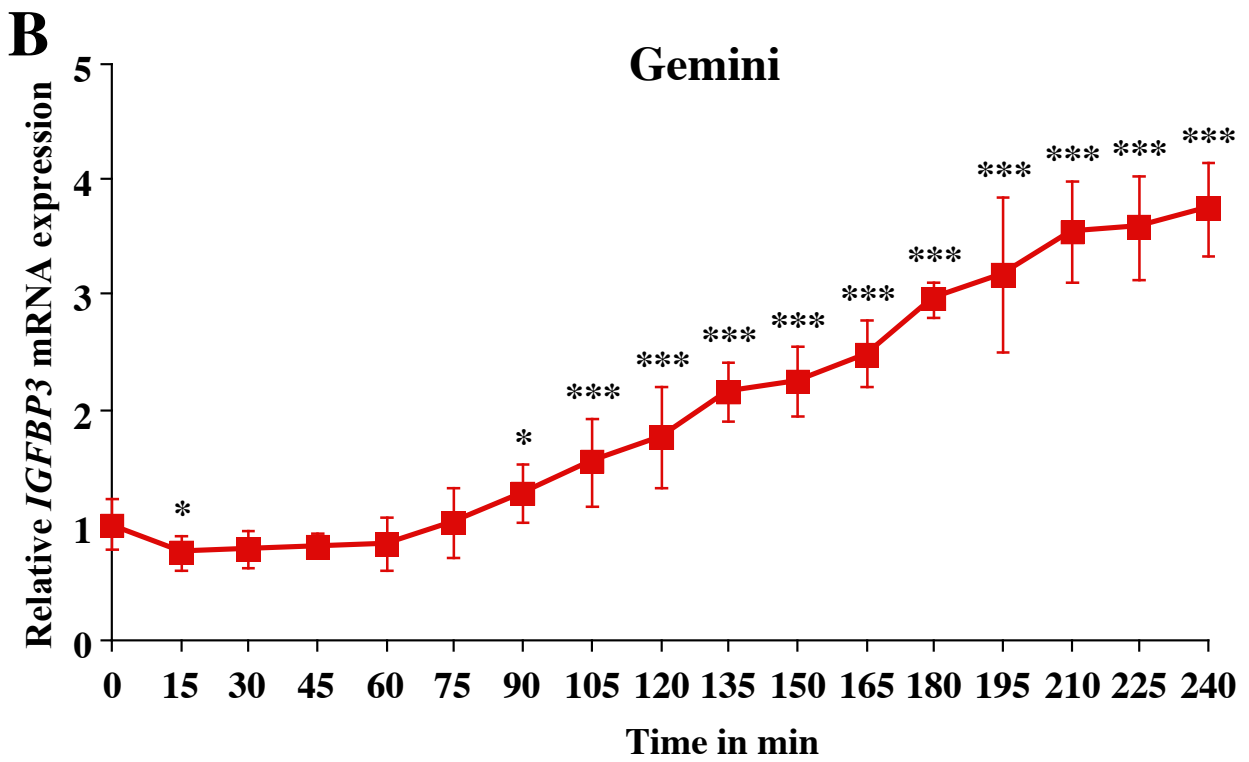

**Fig. S2**

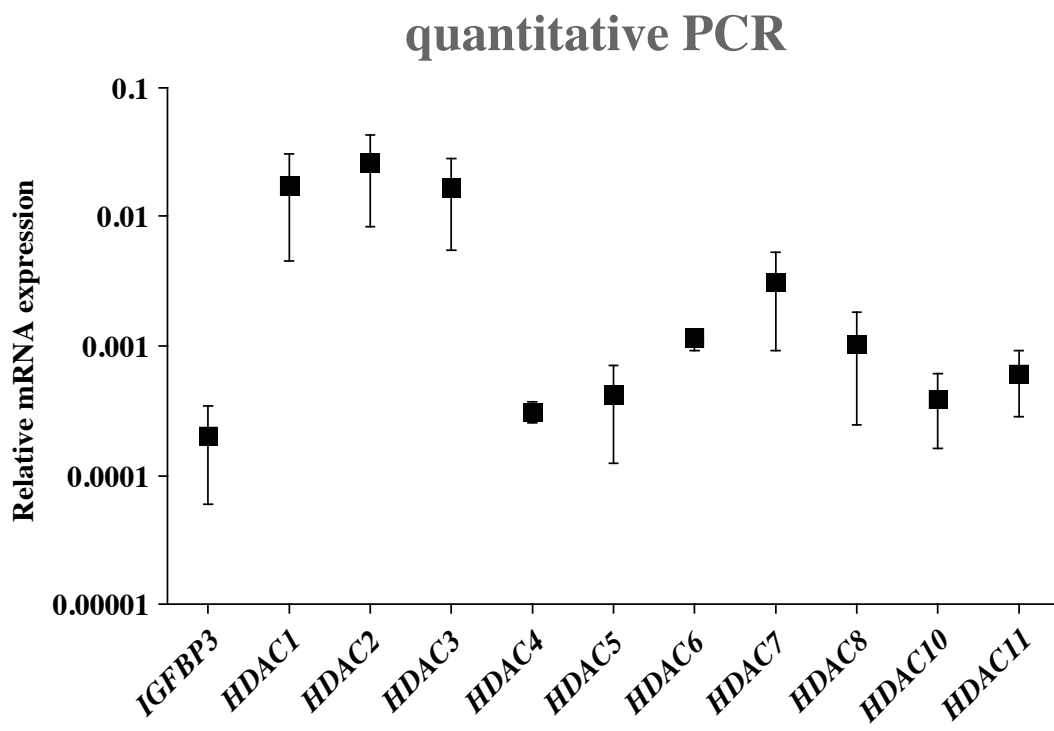

**Fig. S3**

## *In silico* screening

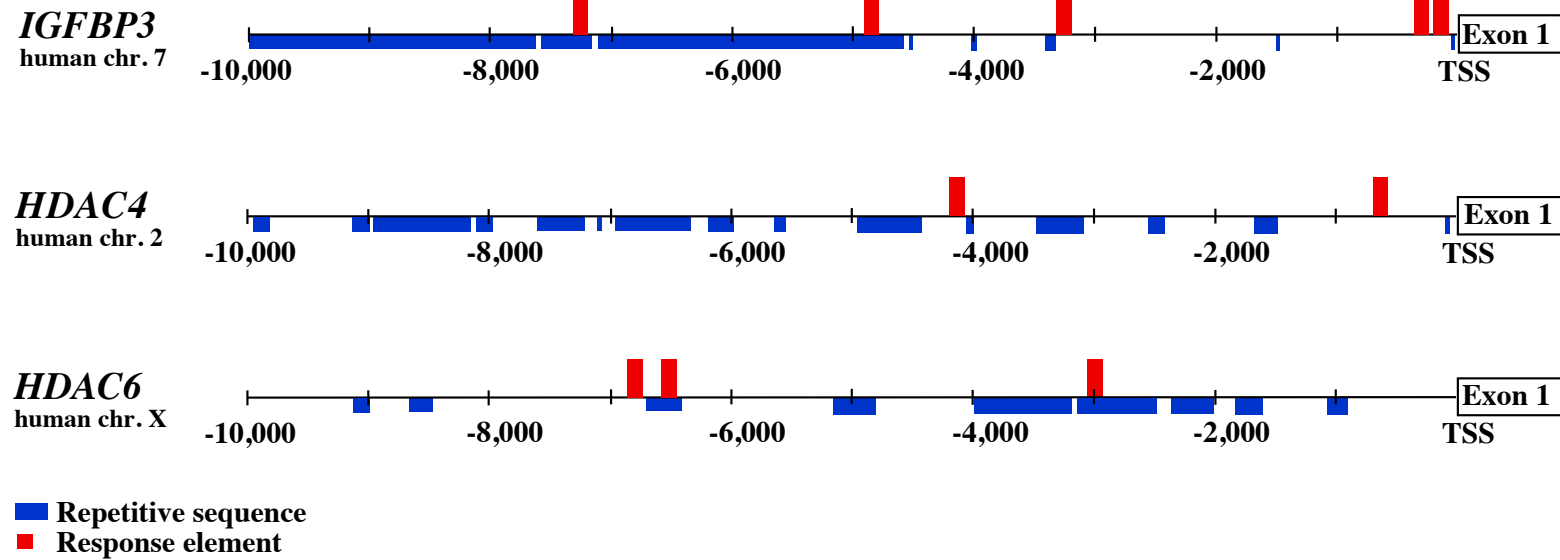

| Gene          | Chr   | Start     | End       | Strand | Sequence        |
|---------------|-------|-----------|-----------|--------|-----------------|
| <i>IGFBP3</i> | chr 7 | 45927738  | 45927724  | -      | GGGTCAaggAGATCG |
| <i>IGFBP3</i> | chr 7 | 45927747  | 45927733  | -      | AGGGCGgcgGGGTCA |
| <i>IGFBP3</i> | chr 7 | 45930684  | 45930698  | +      | GGTTCaccgGGTGCA |
| <i>IGFBP3</i> | chr 7 | 45932200  | 45932186  | -      | AGGTCAagaAGTTTT |
| <i>IGFBP3</i> | chr 7 | 45934746  | 45934760  | +      | AGTTTAgaaAGTCCA |
| <i>HDAC4</i>  | chr 2 | 239988326 | 239988340 | +      | CGGTCActgAGTGCG |
| <i>HDAC4</i>  | chr 2 | 239991831 | 239991845 | +      | AGGACAtgaAGTTCA |
| <i>HDAC6</i>  | chr X | 48538627  | 48538613  | -      | AGTTCAcccAGGTGA |
| <i>HDAC6</i>  | chr X | 48538868  | 48538882  | +      | AGTTGctttAGTTCA |
| <i>HDAC6</i>  | chr X | 48542429  | 48542415  | -      | AGGTCAggaATTTGA |

**Fig. S4**

quantitative PCR

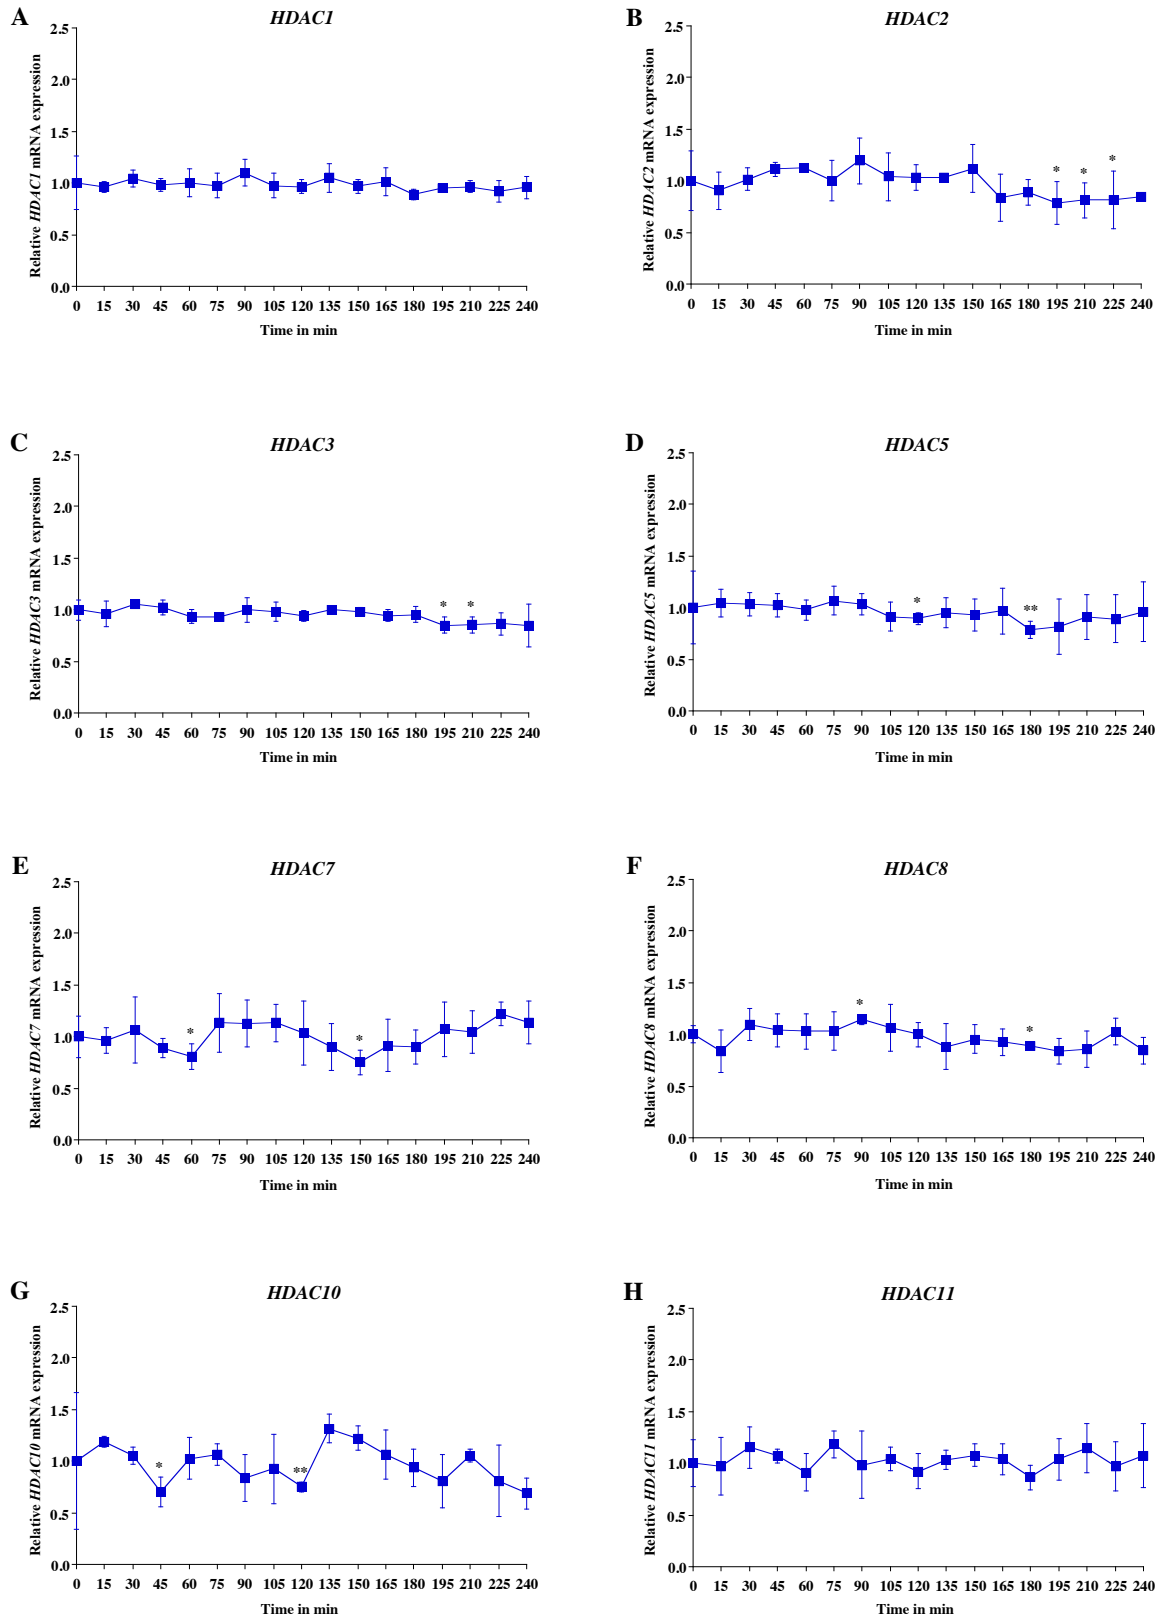

Fig. S5



quantitative PCR

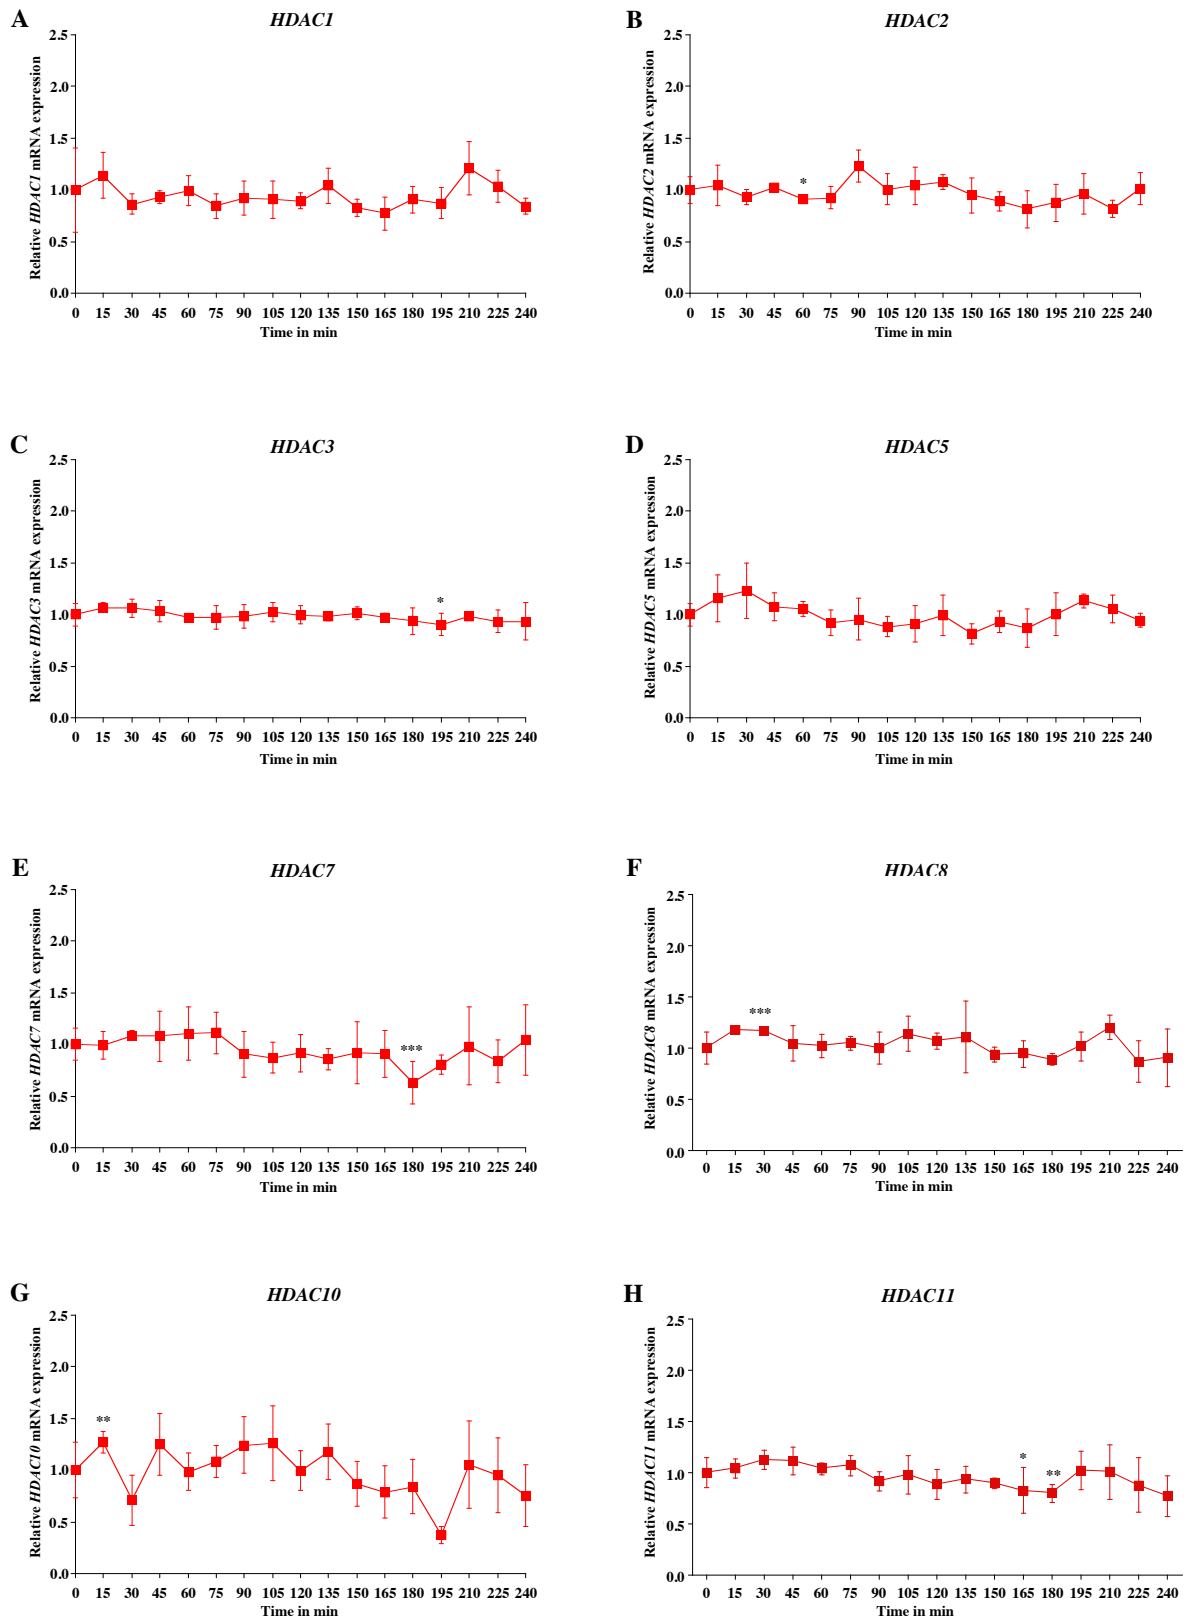

Fig. S6

quantitative PCR and Western blotting

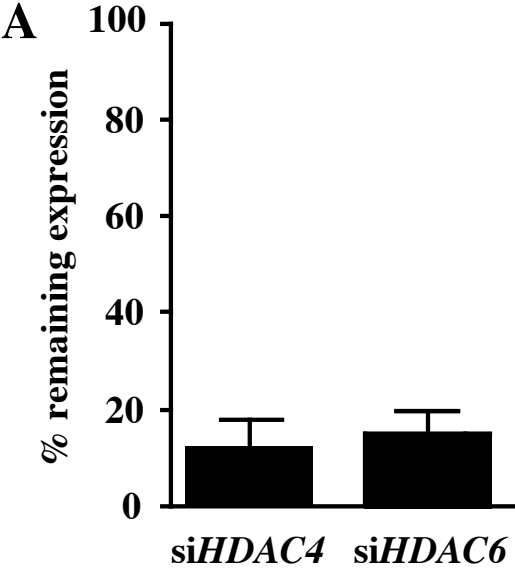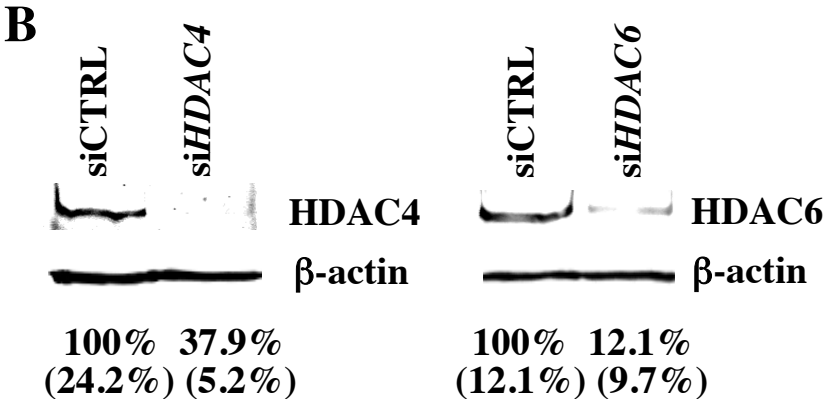

Fig. S7

# Agarose gel electrophoresis

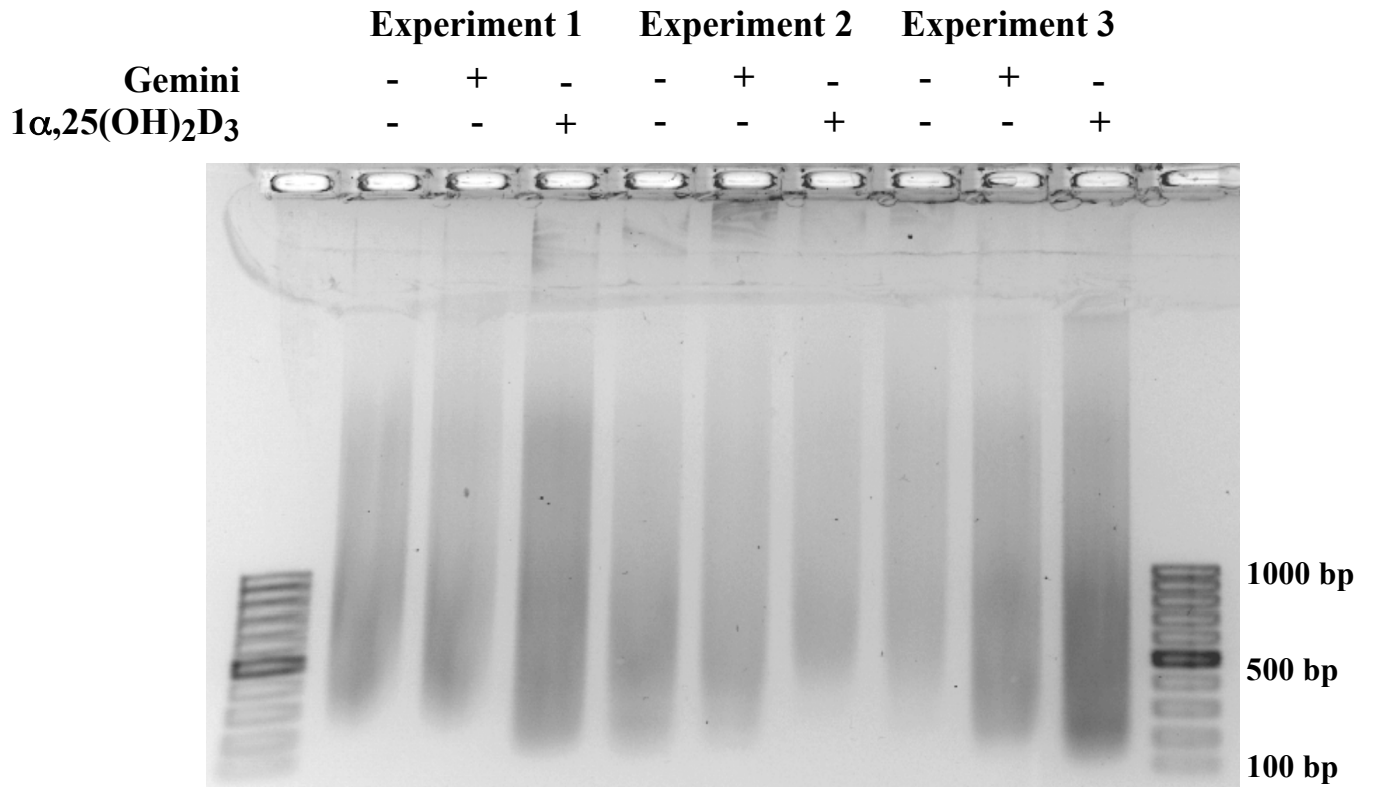

**Fig. S8**
